# Supplementary material
Source: publisher site journal article supplement (https://www.dovepress.com/article/500632)
Supplement: Supplementary file 1 [file get_supplementary_file.php]

Table S1. Detailed information on the IVs used in the MR analyses for the causal effect of basophil count o

| chr | pos       | SNP        | effect_allele<br>e.exposure | other_allele<br>e.exposure | effect_allele<br>e.outcome | other_allele<br>e.outcome | beta.exposure |
|-----|-----------|------------|-----------------------------|----------------------------|----------------------------|---------------------------|---------------|
| 8   | 55422440  | rs10104003 | T                           | C                          | T                          | C                         | -0.0256127    |
| 9   | 115918552 | rs10121164 | A                           | G                          | A                          | G                         | -0.0221606    |
| 18  | 48147876  | rs1025688  | A                           | G                          | A                          | G                         | 0.0233885     |
| 10  | 13558641  | rs10752308 | A                           | G                          | A                          | G                         | -0.0210245    |
| 12  | 88845035  | rs10858740 | G                           | A                          | G                          | A                         | -0.0255937    |
| 10  | 99075300  | rs10882895 | G                           | A                          | G                          | A                         | 0.0468182     |
| 2   | 219020958 | rs11405063 | T                           | C                          | T                          | C                         | -0.168526     |
| 6   | 16744687  | rs1144700  | T                           | C                          | T                          | C                         | -0.034444     |
| 1   | 111604823 | rs1149193  | A                           | G                          | A                          | G                         | -0.0218567    |
| 19  | 45742094  | rs11673093 | A                           | G                          | A                          | G                         | -0.0481685    |
| 2   | 169710607 | rs11678685 | A                           | G                          | A                          | G                         | 0.0295942     |
| 4   | 74959996  | rs11725704 | G                           | A                          | G                          | A                         | 0.0729688     |
| 4   | 705074    | rs11734460 | T                           | C                          | T                          | C                         | 0.0258943     |
| 3   | 47262246  | rs11920354 | A                           | C                          | A                          | C                         | -0.0210252    |
| 4   | 7047102   | rs11931598 | T                           | C                          | T                          | C                         | -0.0222846    |
| 1   | 247601595 | rs12239046 | C                           | T                          | C                          | T                         | 0.0325742     |
| 10  | 25211291  | rs12266014 | T                           | C                          | T                          | C                         | -0.0440665    |
| 15  | 41782684  | rs12440045 | C                           | A                          | C                          | A                         | -0.0240682    |
| 8   | 22966769  | rs12550612 | A                           | G                          | A                          | G                         | -0.0303817    |
| 15  | 51058629  | rs12593998 | C                           | A                          | C                          | A                         | -0.0245573    |
| 17  | 38163295  | rs12600856 | C                           | T                          | C                          | T                         | 0.121938      |
| 2   | 27730940  | rs1260326  | C                           | T                          | C                          | T                         | -0.0325166    |
| 5   | 179152106 | rs12656648 | A                           | C                          | A                          | C                         | -0.0245763    |
| 17  | 16168784  | rs12936529 | T                           | C                          | T                          | C                         | -0.0381967    |
| 4   | 145031841 | rs13125760 | T                           | C                          | T                          | C                         | -0.0207507    |
| 4   | 120168588 | rs13139045 | C                           | T                          | C                          | T                         | -0.0202835    |
| 8   | 142338776 | rs13249310 | C                           | T                          | C                          | T                         | -0.0289164    |
| 6   | 7211751   | rs1334577  | A                           | G                          | A                          | G                         | -0.0247431    |
| 4   | 72617775  | rs1352846  | G                           | A                          | G                          | A                         | -0.0254518    |
| 11  | 308314    | rs14408    | C                           | T                          | C                          | T                         | 0.0523375     |
| 1   | 27121930  | rs14609110 | A                           | G                          | A                          | G                         | -0.0573872    |
| 3   | 141008123 | rs1567558  | G                           | A                          | G                          | A                         | -0.0254724    |
| 13  | 50121511  | rs1570884  | G                           | A                          | G                          | A                         | 0.0236259     |
| 4   | 74703999  | rs16850073 | T                           | C                          | T                          | C                         | 0.0532695     |
| 6   | 42515791  | rs16895831 | T                           | C                          | T                          | C                         | 0.0284246     |
| 18  | 42113151  | rs16978075 | C                           | T                          | C                          | T                         | 0.0367062     |
| 6   | 32066177  | rs17421624 | C                           | T                          | C                          | T                         | 0.0387602     |
| 10  | 44881660  | rs17885289 | T                           | C                          | T                          | C                         | -0.0223103    |
| 20  | 43042364  | rs1800961  | T                           | C                          | T                          | C                         | -0.0696768    |
| 11  | 59959843  | rs1834550  | C                           | T                          | C                          | T                         | -0.0200106    |
| 1   | 66105944  | rs1892534  | T                           | C                          | T                          | C                         | -0.0471153    |
| 8   | 130624816 | rs1982094  | T                           | C                          | T                          | C                         | -0.0711671    |
| 14  | 25461989  | rs2038700  | C                           | T                          | C                          | T                         | 0.0352193     |
| 5   | 148200553 | rs2082382  | A                           | G                          | A                          | G                         | -0.0359256    |
| 6   | 159470058 | rs212409   | A                           | G                          | A                          | G                         | -0.025413     |
| 9   | 136921464 | rs2157770  | G                           | A                          | G                          | A                         | 0.0216855     |
| 4   | 55408999  | rs218265   | C                           | T                          | C                          | T                         | 0.0414956     |
| 1   | 236090155 | rs2208568  | C                           | T                          | C                          | T                         | -0.0626016    |

|    |           |            |   |   |   |   |            |
|----|-----------|------------|---|---|---|---|------------|
| 10 | 91004916  | rs2246941  | A | C | A | C | 0.0215573  |
| 7  | 6704332   | rs2251188  | G | A | G | A | 0.0213674  |
| 5  | 71728688  | rs2338224  | G | A | G | A | -0.0419011 |
| 7  | 148779032 | rs2373437  | C | T | C | T | -0.0228586 |
| 8  | 103852407 | rs2436845  | A | G | A | G | -0.0215608 |
| 5  | 141539339 | rs249677   | A | C | A | C | 0.028047   |
| 13 | 28612886  | rs2504235  | G | A | G | A | 0.0257358  |
| 6  | 31242174  | rs2524079  | A | G | A | G | 0.0635231  |
| 7  | 36085142  | rs2700938  | C | T | C | T | 0.0203728  |
| 10 | 81047575  | rs2802372  | C | A | C | A | -0.0204912 |
| 10 | 28784483  | rs2807740  | T | C | T | C | 0.0405209  |
| 11 | 113957197 | rs2846630  | A | G | A | G | 0.0268188  |
| 8  | 30280833  | rs2979489  | A | G | A | G | 0.0281169  |
| 9  | 276053    | rs2992836  | T | G | T | G | 0.0296304  |
| 16 | 85936978  | rs305082   | C | T | C | T | 0.0383383  |
| 12 | 111884608 | rs3184504  | C | T | C | T | -0.0259686 |
| 1  | 159175494 | rs34599082 | T | C | T | C | -0.170161  |
| 7  | 45009341  | rs3735485  | G | A | G | A | 0.0327729  |
| 14 | 93118669  | rs3742716  | A | G | A | G | 0.0266721  |
| 10 | 73520632  | rs3747869  | C | A | C | A | 0.0334004  |
| 10 | 126348565 | rs3781454  | A | G | A | G | 0.0218783  |
| 9  | 4763176   | rs385893   | C | T | C | T | 0.0266236  |
| 1  | 79411968  | rs41313381 | A | C | A | C | 0.0649446  |
| 19 | 1049305   | rs4147915  | A | C | A | C | -0.0362118 |
| 7  | 50282396  | rs4244229  | G | A | G | A | 0.0216826  |
| 7  | 92408370  | rs445      | T | C | T | C | -0.0992611 |
| 8  | 68797804  | rs4623401  | G | A | G | A | -0.0240865 |
| 16 | 30500985  | rs4630562  | G | A | G | A | 0.0198563  |
| 19 | 44153100  | rs4760     | G | A | G | A | -0.0859248 |
| 12 | 69732105  | rs4761234  | C | T | C | T | 0.023041   |
| 1  | 208034329 | rs4844622  | T | C | T | C | -0.0241131 |
| 17 | 56356502  | rs56378716 | G | A | G | A | 0.140216   |
| 7  | 28724374  | rs56388170 | T | G | T | G | 0.075626   |
| 22 | 18169212  | rs5747327  | G | T | G | T | 0.0206487  |
| 11 | 61618169  | rs61897795 | G | A | G | A | -0.0339965 |
| 16 | 3746241   | rs6500550  | T | C | T | C | -0.0236395 |
| 1  | 114303808 | rs6679677  | A | C | A | C | -0.0426571 |
| 2  | 182308352 | rs6740847  | G | A | G | A | 0.0250549  |
| 9  | 86368660  | rs7047907  | A | G | A | G | 0.0226361  |
| 15 | 101723499 | rs7168592  | T | C | T | C | 0.0424535  |
| 19 | 7846887   | rs7259539  | T | C | T | C | 0.0213497  |
| 1  | 46446096  | rs72692639 | G | A | G | A | 0.0245885  |
| 2  | 55013646  | rs72917514 | A | G | A | G | 0.065068   |
| 17 | 72699384  | rs749780   | A | C | A | C | 0.0239013  |
| 2  | 101776932 | rs7575217  | G | A | G | A | 0.0218989  |
| 3  | 128320345 | rs7646596  | G | T | G | T | -0.0689    |
| 4  | 106061534 | rs7679673  | A | C | A | C | -0.0235871 |
| 5  | 1285974   | rs7705526  | A | C | A | C | 0.035273   |
| 7  | 8018180   | rs7804306  | A | G | A | G | -0.0416659 |
| 5  | 173205225 | rs791357   | C | T | C | T | -0.0414239 |
| 17 | 1321116   | rs8068017  | C | T | C | T | 0.0236761  |

|    |           |           |   |   |   |   |            |
|----|-----------|-----------|---|---|---|---|------------|
| 7  | 92236164  | rs8179    | C | T | C | T | -0.0390114 |
| 18 | 21087531  | rs891389  | T | C | T | C | -0.0246899 |
| 12 | 122219787 | rs9165    | C | T | C | T | 0.0221098  |
| 6  | 87839741  | rs9344678 | T | C | T | C | -0.0296688 |
| 6  | 21385989  | rs9350353 | T | G | T | G | -0.0243319 |
| 6  | 109607556 | rs9400271 | A | G | A | G | 0.0339515  |
| 6  | 135419688 | rs9402685 | C | T | C | T | -0.0341021 |
| 18 | 43829655  | rs9955853 | T | C | T | C | -0.0208861 |
| 21 | 40463283  | rs9977672 | A | G | A | G | -0.0256165 |
| 6  | 43757896  | rs998584  | A | C | A | C | 0.0203857  |

n GDM

| beta.outcome | eaf.exposure | eaf.outcome | se.exposure | se.outcome | samplesize.<br>exposure | samplesize.<br>outcome | pval.outcome |
|--------------|--------------|-------------|-------------|------------|-------------------------|------------------------|--------------|
| 0.0107       | 0.2027       | 0.2336      | 0.00447621  | 0.0238     | 170143                  | 123579                 | 0.654201     |
| 0.0191       | 0.6769       | 0.6293      | 0.00387557  | 0.0209     | 170143                  | 123579                 | 0.3596       |
| 0.0196       | 0.3745       | 0.2882      | 0.00374148  | 0.0223     | 170143                  | 123579                 | 0.38         |
| 0.023        | 0.3335       | 0.5036      | 0.00380865  | 0.0203     | 170143                  | 123579                 | 0.2589       |
| -0.0087      | 0.7009       | 0.5959      | 0.00392483  | 0.0205     | 170143                  | 123579                 | 0.6703       |
| -0.0259      | 0.5964       | 0.5809      | 0.00365495  | 0.0204     | 170143                  | 123579                 | 0.2055       |
| -0.0799      | 0.0106       | 0.01674     | 0.0194678   | 0.0795     | 170143                  | 123579                 | 0.3147       |
| 0.0258       | 0.1789       | 0.141       | 0.0047267   | 0.0289     | 170143                  | 123579                 | 0.3734       |
| -0.0051      | 0.3476       | 0.3138      | 0.00377878  | 0.0218     | 170143                  | 123579                 | 0.8154       |
| 0.018        | 0.2608       | 0.2954      | 0.00411439  | 0.0221     | 170143                  | 123579                 | 0.4157       |
| -0.0083      | 0.3181       | 0.3934      | 0.00385526  | 0.0206     | 170143                  | 123579                 | 0.6862       |
| -0.0036      | 0.3762       | 0.3295      | 0.00370262  | 0.0214     | 170143                  | 123579                 | 0.8653       |
| -0.0228      | 0.3121       | 0.2536      | 0.00387338  | 0.0232     | 170143                  | 123579                 | 0.3246       |
| -0.0243      | 0.3861       | 0.3656      | 0.00367101  | 0.0209     | 170143                  | 123579                 | 0.2442       |
| -9.00E-04    | 0.4444       | 0.4669      | 0.00364481  | 0.0202     | 170143                  | 123579                 | 0.9657       |
| -0.0333      | 0.6282       | 0.6218      | 0.00370821  | 0.0209     | 170143                  | 123579                 | 0.1107       |
| 0.0082       | 0.3687       | 0.3857      | 0.003725    | 0.0207     | 170143                  | 123579                 | 0.692        |
| 0.0069       | 0.5282       | 0.5168      | 0.00364797  | 0.0202     | 170143                  | 123579                 | 0.7323       |
| 0.0022       | 0.8226       | 0.7668      | 0.00471604  | 0.0238     | 170143                  | 123579                 | 0.9278       |
| -0.0013      | 0.3077       | 0.3269      | 0.00393462  | 0.0215     | 170143                  | 123579                 | 0.9521       |
| -0.0196      | 0.3904       | 0.3974      | 0.00366291  | 0.0205     | 170143                  | 123579                 | 0.3384       |
| 0.1184       | 0.6053       | 0.6502      | 0.0036528   | 0.0212     | 170143                  | 123579                 | 2.20E-08     |
| -0.0173      | 0.4222       | 0.429       | 0.00363259  | 0.0203     | 170143                  | 123579                 | 0.3947       |
| -0.0026      | 0.4787       | 0.5039      | 0.0035963   | 0.0201     | 170143                  | 123579                 | 0.8959       |
| -0.0392      | 0.4641       | 0.5861      | 0.00366422  | 0.0205     | 170143                  | 123579                 | 0.0560196    |
| 0.0151       | 0.3686       | 0.3108      | 0.00371133  | 0.0217     | 170143                  | 123579                 | 0.4864       |
| 0.029        | 0.3601       | 0.3712      | 0.00374544  | 0.0208     | 170143                  | 123579                 | 0.1633       |
| 0.0119       | 0.2372       | 0.2569      | 0.00420406  | 0.023      | 170143                  | 123579                 | 0.604999     |
| 0.0471       | 0.2919       | 0.2108      | 0.00394253  | 0.0247     | 170143                  | 123579                 | 0.0566005    |
| -0.0106      | 0.3668       | 0.3415      | 0.00376241  | 0.0213     | 170143                  | 123579                 | 0.6183       |
| 0.057        | 0.0344       | 0.02645     | 0.00994839  | 0.0617     | 170143                  | 123579                 | 0.3557       |
| -0.007       | 0.5985       | 0.5953      | 0.00379177  | 0.0208     | 170143                  | 123579                 | 0.735201     |
| 0.0279       | 0.7105       | 0.6001      | 0.00395681  | 0.0206     | 170143                  | 123579                 | 0.1751       |
| 0.0076       | 0.3749       | 0.3834      | 0.00372164  | 0.0207     | 170143                  | 123579                 | 0.713899     |
| 0.0213       | 0.2032       | 0.2286      | 0.004497    | 0.0239     | 170143                  | 123579                 | 0.374        |
| 0.0085       | 0.11         | 0.1114      | 0.00577937  | 0.032      | 170143                  | 123579                 | 0.7914       |
| 0.0472       | 0.2874       | 0.378       | 0.00395461  | 0.0209     | 170143                  | 123579                 | 0.0237001    |
| 0.004        | 0.3066       | 0.2969      | 0.00390794  | 0.0222     | 170143                  | 123579                 | 0.8569       |
| 0.0342       | 0.0314       | 0.04522     | 0.0103184   | 0.0486     | 170143                  | 123579                 | 0.4821       |
| -0.0217      | 0.4008       | 0.3043      | 0.0036164   | 0.0219     | 170143                  | 123579                 | 0.322        |
| 0.0197       | 0.3768       | 0.4815      | 0.00369811  | 0.0201     | 170143                  | 123579                 | 0.3267       |
| 0.0702       | 0.0424       | 0.03041     | 0.0090657   | 0.0597     | 170143                  | 123579                 | 0.2397       |
| -0.0089      | 0.3933       | 0.3877      | 0.00368203  | 0.0207     | 170143                  | 123579                 | 0.6669       |
| 0.0535       | 0.5467       | 0.6457      | 0.00364061  | 0.0211     | 170143                  | 123579                 | 0.0111301    |
| 0.0011       | 0.5529       | 0.5801      | 0.00362559  | 0.0204     | 170143                  | 123579                 | 0.9588       |
| 0.0248       | 0.2848       | 0.4117      | 0.00397795  | 0.0204     | 170143                  | 123579                 | 0.2244       |
| -0.0144      | 0.1571       | 0.165       | 0.00499354  | 0.0273     | 170143                  | 123579                 | 0.5987       |
| -0.0074      | 0.8919       | 0.9147      | 0.00582597  | 0.036      | 170143                  | 123579                 | 0.8364       |

|          |        |          |            |        |        |        |           |
|----------|--------|----------|------------|--------|--------|--------|-----------|
| -0.0218  | 0.3434 | 0.4208   | 0.00377897 | 0.0203 | 170143 | 123579 | 0.2842    |
| -0.0081  | 0.5764 | 0.618    | 0.00364766 | 0.0209 | 170143 | 123579 | 0.6979    |
| 0.0196   | 0.8787 | 0.8841   | 0.0054976  | 0.0315 | 170143 | 123579 | 0.5327    |
| 0.0144   | 0.6411 | 0.7102   | 0.00373475 | 0.0221 | 170143 | 123579 | 0.5141    |
| -0.0129  | 0.4342 | 0.4952   | 0.00363567 | 0.0202 | 170143 | 123579 | 0.5226    |
| 0.0199   | 0.632  | 0.6949   | 0.00373651 | 0.0218 | 170143 | 123579 | 0.3611    |
| -0.0179  | 0.6359 | 0.6136   | 0.00373853 | 0.0207 | 170143 | 123579 | 0.3869    |
| -0.0175  | 0.4168 | 0.3909   | 0.00363503 | 0.0235 | 170143 | 123579 | 0.457     |
| -0.0214  | 0.3766 | 0.3545   | 0.0037008  | 0.021  | 170143 | 123579 | 0.308     |
| -0.0021  | 0.4345 | 0.5195   | 0.00365463 | 0.0202 | 170143 | 123579 | 0.9173    |
| 0.0172   | 0.7693 | 0.7994   | 0.00426588 | 0.0253 | 170143 | 123579 | 0.4952    |
| 0.0213   | 0.4529 | 0.4894   | 0.00375663 | 0.0202 | 170143 | 123579 | 0.2913    |
| -0.0119  | 0.7425 | 0.7097   | 0.00409042 | 0.0222 | 170143 | 123579 | 0.5924    |
| -0.0576  | 0.1872 | 0.124    | 0.00467286 | 0.0307 | 170143 | 123579 | 0.0604394 |
| -0.0183  | 0.1723 | 0.2438   | 0.00478681 | 0.0235 | 170143 | 123579 | 0.4371    |
| 0.0325   | 0.5177 | 0.5904   | 0.00357738 | 0.0204 | 170143 | 123579 | 0.1111    |
| 0.1553   | 0.0138 | 0.005978 | 0.0153949  | 0.1291 | 170143 | 123579 | 0.2289    |
| 0.035    | 0.8456 | 0.8757   | 0.00495932 | 0.0307 | 170143 | 123579 | 0.2532    |
| 0.0033   | 0.325  | 0.407    | 0.00382882 | 0.0205 | 170143 | 123579 | 0.874     |
| 7.00E-04 | 0.9005 | 0.8086   | 0.0059774  | 0.0258 | 170143 | 123579 | 0.9775    |
| -0.0313  | 0.6785 | 0.5892   | 0.00386236 | 0.0205 | 170143 | 123579 | 0.1275    |
| -0.0081  | 0.5221 | 0.4735   | 0.00359038 | 0.0203 | 170143 | 123579 | 0.689     |
| 0.0064   | 0.0307 | 0.01729  | 0.0103758  | 0.0772 | 170143 | 123579 | 0.9344    |
| 0.0094   | 0.1475 | 0.1255   | 0.00517022 | 0.0306 | 170143 | 123579 | 0.760001  |
| 0.0067   | 0.6749 | 0.7246   | 0.00382361 | 0.0226 | 170143 | 123579 | 0.767901  |
| 0.0026   | 0.0971 | 0.05827  | 0.00607556 | 0.0435 | 170143 | 123579 | 0.9523    |
| 0.0114   | 0.4694 | 0.3631   | 0.00363858 | 0.0211 | 170143 | 123579 | 0.5897    |
| -0.007   | 0.5439 | 0.596    | 0.00360393 | 0.0206 | 170143 | 123579 | 0.7323    |
| 0.0442   | 0.157  | 0.1686   | 0.00493017 | 0.0272 | 170143 | 123579 | 0.104     |
| -0.0387  | 0.4859 | 0.4119   | 0.00359903 | 0.0205 | 170143 | 123579 | 0.0590405 |
| -0.0029  | 0.2412 | 0.2241   | 0.00419521 | 0.0242 | 170143 | 123579 | 0.9056    |
| 0.0513   | 0.0127 | 0.03222  | 0.0160032  | 0.0566 | 170143 | 123579 | 0.3643    |
| 0.0078   | 0.2959 | 0.2844   | 0.00398679 | 0.0224 | 170143 | 123579 | 0.7263    |
| -0.0068  | 0.5041 | 0.4934   | 0.003586   | 0.0202 | 170143 | 123579 | 0.7347    |
| 0.0479   | 0.1643 | 0.09335  | 0.00489173 | 0.0347 | 170143 | 123579 | 0.1677    |
| -0.008   | 0.3027 | 0.2894   | 0.00393267 | 0.0222 | 170143 | 123579 | 0.7179    |
| 0.0264   | 0.1016 | 0.1481   | 0.00591055 | 0.0281 | 170143 | 123579 | 0.348     |
| -0.006   | 0.5637 | 0.5996   | 0.00362665 | 0.0206 | 170143 | 123579 | 0.7703    |
| 0.0413   | 0.7438 | 0.7472   | 0.00410507 | 0.0231 | 170143 | 123579 | 0.0738295 |
| 0.0118   | 0.1071 | 0.137    | 0.00580689 | 0.0294 | 170143 | 123579 | 0.6867    |
| 0.0082   | 0.4887 | 0.5554   | 0.00361214 | 0.0202 | 170143 | 123579 | 0.684699  |
| -0.0116  | 0.2592 | 0.303    | 0.00408173 | 0.0219 | 170143 | 123579 | 0.5972    |
| 0.0302   | 0.033  | 0.02975  | 0.0100732  | 0.0589 | 170143 | 123579 | 0.608501  |
| -0.0356  | 0.7317 | 0.6597   | 0.00407105 | 0.0213 | 170143 | 123579 | 0.0938707 |
| 0.0283   | 0.6724 | 0.6856   | 0.0038278  | 0.0217 | 170143 | 123579 | 0.1931    |
| 0.0368   | 0.8932 | 0.9078   | 0.00583231 | 0.035  | 170143 | 123579 | 0.2933    |
| 0.0109   | 0.3745 | 0.491    | 0.0036854  | 0.0201 | 170143 | 123579 | 0.5882    |
| -0.0022  | 0.3291 | 0.323    | 0.00389639 | 0.0216 | 170143 | 123579 | 0.9204    |
| -0.0671  | 0.0606 | 0.02655  | 0.00760423 | 0.063  | 170143 | 123579 | 0.2869    |
| 0.0274   | 0.7204 | 0.7262   | 0.00406122 | 0.0226 | 170143 | 123579 | 0.2241    |
| 0.0231   | 0.7007 | 0.6083   | 0.00395137 | 0.0207 | 170143 | 123579 | 0.2638    |

|         |        |        |            |        |        |        |            |
|---------|--------|--------|------------|--------|--------|--------|------------|
| -0.0112 | 0.7915 | 0.7865 | 0.00442927 | 0.0246 | 170143 | 123579 | 0.6494     |
| 0.0554  | 0.3478 | 0.3499 | 0.00379214 | 0.0211 | 170143 | 123579 | 0.00855008 |
| -0.0308 | 0.6884 | 0.6058 | 0.00400919 | 0.0221 | 170143 | 123579 | 0.163      |
| 0.001   | 0.4793 | 0.4716 | 0.00362316 | 0.0201 | 170143 | 123579 | 0.9617     |
| -0.0014 | 0.3565 | 0.3479 | 0.00374283 | 0.0211 | 170143 | 123579 | 0.9473     |
| 0.0237  | 0.4836 | 0.5857 | 0.00358955 | 0.0204 | 170143 | 123579 | 0.2458     |
| -0.0167 | 0.2496 | 0.3413 | 0.0042803  | 0.0213 | 170143 | 123579 | 0.4328     |
| -0.0178 | 0.5612 | 0.5633 | 0.00361835 | 0.0203 | 170143 | 123579 | 0.3806     |
| 0.0173  | 0.2582 | 0.236  | 0.00415407 | 0.0238 | 170143 | 123579 | 0.4672     |
| 0.0302  | 0.4819 | 0.4811 | 0.00359015 | 0.0202 | 170143 | 123579 | 0.1347     |

| pval.exposure | EAF2   | MAF    | PVE         | F-statistics |
|---------------|--------|--------|-------------|--------------|
| 1.05E-08      | 0.7973 | 0.2027 | 0.000192394 | 32.74045526  |
| 1.08E-08      | 0.3231 | 0.3231 | 0.00019213  | 32.69540742  |
| 4.08E-10      | 0.6255 | 0.3745 | 0.000229617 | 39.07624088  |
| 3.39E-08      | 0.6665 | 0.3335 | 0.000179068 | 30.47222164  |
| 6.99E-11      | 0.2991 | 0.2991 | 0.000249863 | 42.52255426  |
| 1.45E-37      | 0.4036 | 0.4036 | 0.00096346  | 164.0821884  |
| 4.86E-18      | 0.9894 | 0.0106 | 0.000440245 | 74.93676982  |
| 3.17E-13      | 0.8211 | 0.1789 | 0.000312005 | 53.10140087  |
| 7.29E-09      | 0.6524 | 0.3476 | 0.000196592 | 33.45498668  |
| 1.17E-31      | 0.7392 | 0.2608 | 0.000804918 | 137.0598424  |
| 1.64E-14      | 0.6819 | 0.3181 | 0.000346211 | 58.92515847  |
| 1.87E-86      | 0.6238 | 0.3762 | 0.002277466 | 388.3747779  |
| 2.31E-11      | 0.6879 | 0.3121 | 0.000262603 | 44.69130474  |
| 1.02E-08      | 0.6139 | 0.3861 | 0.000192758 | 32.80227998  |
| 9.71E-10      | 0.5556 | 0.4444 | 0.00021966  | 37.38133379  |
| 1.57E-18      | 0.3718 | 0.3718 | 0.000453323 | 77.1638291   |
| 2.73E-32      | 0.6313 | 0.3687 | 0.000821852 | 139.945667   |
| 4.18E-11      | 0.4718 | 0.4718 | 0.000255776 | 43.5290914   |
| 1.18E-10      | 0.1774 | 0.1774 | 0.000243865 | 41.50152706  |
| 4.34E-10      | 0.6923 | 0.3077 | 0.000228898 | 38.95386332  |
| 1.00E-200     | 0.6096 | 0.3904 | 0.006471306 | 1108.206094  |
| 5.49E-19      | 0.3947 | 0.3947 | 0.000465524 | 79.24162333  |
| 1.33E-11      | 0.5778 | 0.4222 | 0.000268949 | 45.77149823  |
| 2.38E-26      | 0.5213 | 0.4787 | 0.000662579 | 112.806664   |
| 1.49E-08      | 0.5359 | 0.4641 | 0.000188454 | 32.06987865  |
| 4.62E-08      | 0.6314 | 0.3686 | 0.000175524 | 29.86905918  |
| 1.16E-14      | 0.6399 | 0.3601 | 0.0003502   | 59.60430848  |
| 3.97E-09      | 0.7628 | 0.2372 | 0.000203549 | 34.6389967   |
| 1.08E-10      | 0.7081 | 0.2919 | 0.000244887 | 41.67560233  |
| 5.46E-44      | 0.6332 | 0.3668 | 0.00113602  | 193.503401   |
| 8.00E-09      | 0.9656 | 0.0344 | 0.000195535 | 33.27509938  |
| 1.85E-11      | 0.4015 | 0.4015 | 0.000265171 | 45.12847465  |
| 2.36E-09      | 0.2895 | 0.2895 | 0.000209499 | 35.65178054  |
| 1.80E-46      | 0.6251 | 0.3749 | 0.001202685 | 204.8723807  |
| 2.60E-10      | 0.7968 | 0.2032 | 0.000234762 | 39.95193731  |
| 2.14E-10      | 0.89   | 0.11   | 0.000237029 | 40.33785028  |
| 1.11E-22      | 0.7126 | 0.2874 | 0.000564294 | 96.06376263  |
| 1.14E-08      | 0.6934 | 0.3066 | 0.000191522 | 32.59191964  |
| 1.45E-11      | 0.9686 | 0.0314 | 0.00026793  | 45.5980814   |
| 3.14E-08      | 0.5992 | 0.4008 | 0.000179918 | 30.61696906  |
| 3.53E-37      | 0.6232 | 0.3768 | 0.000953095 | 162.3151907  |
| 4.16E-15      | 0.9576 | 0.0424 | 0.000362063 | 61.62412223  |
| 1.12E-21      | 0.6067 | 0.3933 | 0.000537451 | 91.49169834  |
| 5.73E-23      | 0.4533 | 0.4533 | 0.000572002 | 97.37660743  |
| 2.39E-12      | 0.4471 | 0.4471 | 0.000288679 | 49.13029674  |
| 5.00E-08      | 0.7152 | 0.2848 | 0.000174635 | 29.71769595  |
| 9.58E-17      | 0.8429 | 0.1571 | 0.000405692 | 69.05290058  |
| 6.24E-27      | 0.1081 | 0.1081 | 0.00067815  | 115.4593939  |

|          |        |        |             |             |
|----------|--------|--------|-------------|-------------|
| 1.17E-08 | 0.6566 | 0.3434 | 0.000191225 | 32.54143779 |
| 4.69E-09 | 0.4236 | 0.4236 | 0.000201638 | 34.31385831 |
| 2.50E-14 | 0.1213 | 0.1213 | 0.000341305 | 58.08974472 |
| 9.33E-10 | 0.3589 | 0.3589 | 0.000220124 | 37.46028517 |
| 3.02E-09 | 0.5658 | 0.4342 | 0.00020666  | 35.16865212 |
| 6.09E-14 | 0.368  | 0.368  | 0.000331042 | 56.34241084 |
| 5.82E-12 | 0.3641 | 0.3641 | 0.000278444 | 47.38801319 |
| 2.21E-68 | 0.5832 | 0.4168 | 0.001791655 | 305.3811766 |
| 3.69E-08 | 0.6234 | 0.3766 | 0.000178081 | 30.30435937 |
| 2.06E-08 | 0.5655 | 0.4345 | 0.000184737 | 31.43712699 |
| 2.12E-21 | 0.2307 | 0.2307 | 0.000530025 | 90.22684917 |
| 9.40E-13 | 0.5471 | 0.4529 | 0.000299459 | 50.9655521  |
| 6.25E-12 | 0.2575 | 0.2575 | 0.000277629 | 47.24914576 |
| 2.28E-10 | 0.8128 | 0.1872 | 0.000236261 | 40.2072513  |
| 1.16E-15 | 0.8277 | 0.1723 | 0.000376873 | 64.14579892 |
| 3.90E-13 | 0.4823 | 0.4823 | 0.000309612 | 52.69407914 |
| 2.12E-28 | 0.9862 | 0.0138 | 0.000717531 | 122.1690534 |
| 3.89E-11 | 0.1544 | 0.1544 | 0.000256602 | 43.6697169  |
| 3.26E-12 | 0.675  | 0.325  | 0.000285132 | 48.52655006 |
| 2.30E-08 | 0.0995 | 0.0995 | 0.000183478 | 31.22292546 |
| 1.47E-08 | 0.3215 | 0.3215 | 0.00018855  | 32.08607097 |
| 1.21E-13 | 0.4779 | 0.4779 | 0.000323071 | 54.98542956 |
| 3.87E-10 | 0.9693 | 0.0307 | 0.000230212 | 39.17759783 |
| 2.49E-12 | 0.8525 | 0.1475 | 0.000288232 | 49.05429906 |
| 1.42E-08 | 0.3251 | 0.3251 | 0.000188964 | 32.15662296 |
| 5.32E-60 | 0.9029 | 0.0971 | 0.001566357 | 266.9195807 |
| 3.60E-11 | 0.5306 | 0.4694 | 0.000257488 | 43.8206115  |
| 3.60E-08 | 0.4561 | 0.4561 | 0.000178383 | 30.35560217 |
| 5.03E-68 | 0.843  | 0.157  | 0.001782069 | 303.74432   |
| 1.53E-10 | 0.5141 | 0.4859 | 0.000240831 | 40.98515758 |
| 9.04E-09 | 0.7588 | 0.2412 | 0.000194133 | 33.03646565 |
| 1.92E-18 | 0.9873 | 0.0127 | 0.000450995 | 76.76731949 |
| 3.07E-80 | 0.7041 | 0.2959 | 0.002110396 | 359.8242552 |
| 8.50E-09 | 0.4959 | 0.4959 | 0.000194835 | 33.1558185  |
| 3.66E-12 | 0.8357 | 0.1643 | 0.000283796 | 48.29902398 |
| 1.84E-09 | 0.6973 | 0.3027 | 0.000212322 | 36.13237072 |
| 5.31E-13 | 0.8984 | 0.1016 | 0.000306041 | 52.0860901  |
| 4.90E-12 | 0.4363 | 0.4363 | 0.000280439 | 47.72752928 |
| 3.50E-08 | 0.2562 | 0.2562 | 0.000178678 | 30.40583737 |
| 2.65E-13 | 0.8929 | 0.1071 | 0.000314043 | 53.44839862 |
| 3.41E-09 | 0.5113 | 0.4887 | 0.000205282 | 34.93407913 |
| 1.70E-09 | 0.7408 | 0.2592 | 0.00021324  | 36.28861721 |
| 1.05E-10 | 0.967  | 0.033  | 0.000245177 | 41.72486088 |
| 4.33E-09 | 0.2683 | 0.2683 | 0.000202548 | 34.46871303 |
| 1.06E-08 | 0.3276 | 0.3276 | 0.000192331 | 32.72962426 |
| 3.32E-32 | 0.1068 | 0.1068 | 0.000819572 | 139.5571653 |
| 1.55E-10 | 0.6255 | 0.3745 | 0.000240692 | 40.96139403 |
| 1.39E-19 | 0.6709 | 0.3291 | 0.000481434 | 81.95111211 |
| 4.27E-08 | 0.9394 | 0.0606 | 0.000176425 | 30.02243691 |
| 1.99E-24 | 0.2796 | 0.2796 | 0.000611096 | 104.0360445 |
| 2.08E-09 | 0.2993 | 0.2993 | 0.000210969 | 35.90209814 |

|          |        |        |             |             |
|----------|--------|--------|-------------|-------------|
| 1.28E-18 | 0.2085 | 0.2085 | 0.000455729 | 77.57354836 |
| 7.47E-11 | 0.6522 | 0.3478 | 0.000249085 | 42.39013815 |
| 3.49E-08 | 0.3116 | 0.3116 | 0.000178716 | 30.41243867 |
| 2.64E-16 | 0.5207 | 0.4793 | 0.000393949 | 67.05324973 |
| 7.98E-11 | 0.6435 | 0.3565 | 0.00024833  | 42.26167804 |
| 3.13E-21 | 0.5164 | 0.4836 | 0.000525528 | 89.46080742 |
| 1.62E-15 | 0.7504 | 0.2496 | 0.000372939 | 63.47587903 |
| 7.82E-09 | 0.4388 | 0.4388 | 0.000195792 | 33.31873113 |
| 6.98E-10 | 0.7418 | 0.2582 | 0.00022345  | 38.026544   |
| 1.36E-08 | 0.5181 | 0.4819 | 0.000189465 | 32.24192505 |

Table S2 . MR directionality test

| Exposure                                | Outcome                 | snp-r <sup>2</sup> .exposure | snp-r <sup>2</sup> .outcome | correct direction | causal steiger pval |
|-----------------------------------------|-------------------------|------------------------------|-----------------------------|-------------------|---------------------|
| Sum<br>basophil<br>neutrophil<br>counts | Gestational<br>diabetes | 0.049451814                  | 0.001099854                 | TRUE              | 0                   |
